# Supplementary material for: Influence of operating conditions and immobilization on activity of alcohol dehydrogenase for the conversion of formaldehyde to methanol
Source: Royal Society of Chemistry journal article supplement (doi:10.1039/c7nj02028g), 2017-01-01
Supplement: c7nj02028g1.pdf [file c7nj02028g1.pdf]

**Electronic supplementary information for New Journal of Chemistry**

**Influence of operating conditions and immobilization on activity of alcohol  
dehydrogenase for the conversion of formaldehyde to methanol**

Milene Zezzi do Valle Gomes and Anders E.C. Palmqvist\*

Chalmers University of Technology, Department of Chemistry and Chemical Engineering,  
Applied Chemistry, SE 412 96 Gothenburg, Sweden

\*Corresponding author: [anders.palmqvist@chalmers.se](mailto:anders.palmqvist@chalmers.se), tel.: +46 (0)317722961

Email addresses: [milene@chalmers.se](mailto:milene@chalmers.se); [anders.palmqvist@chalmers.se](mailto:anders.palmqvist@chalmers.se)

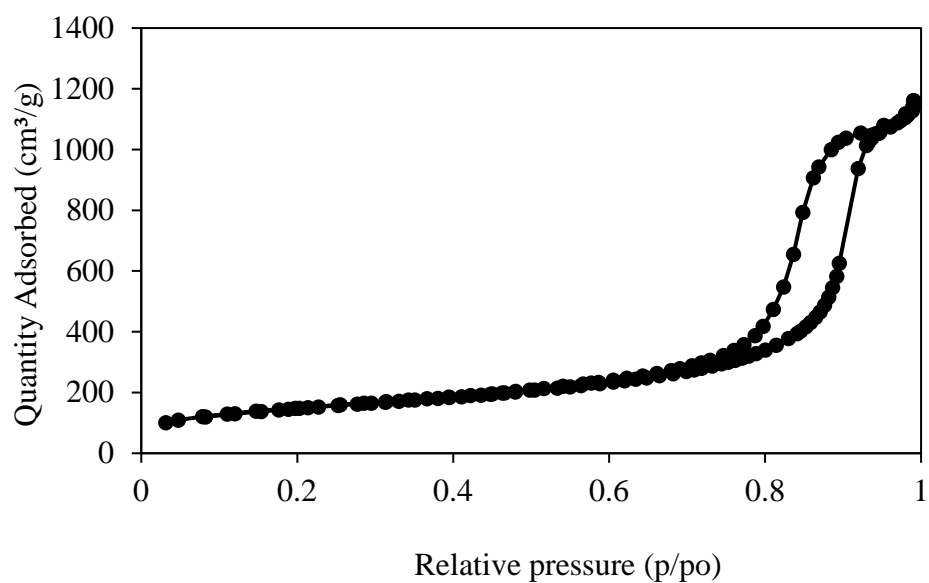

a)

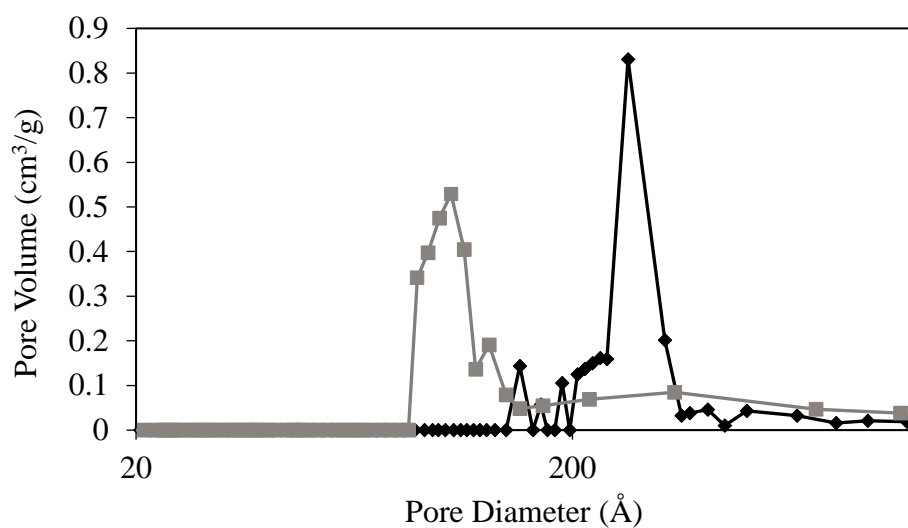

b)

**Fig. S1.** Nitrogen sorption measurements of MCF. (a) Nitrogen adsorption-desorption isotherms and (b) Pore size distribution (calculated from the adsorption isotherm) and window size distribution (calculated from desorption isotherm).

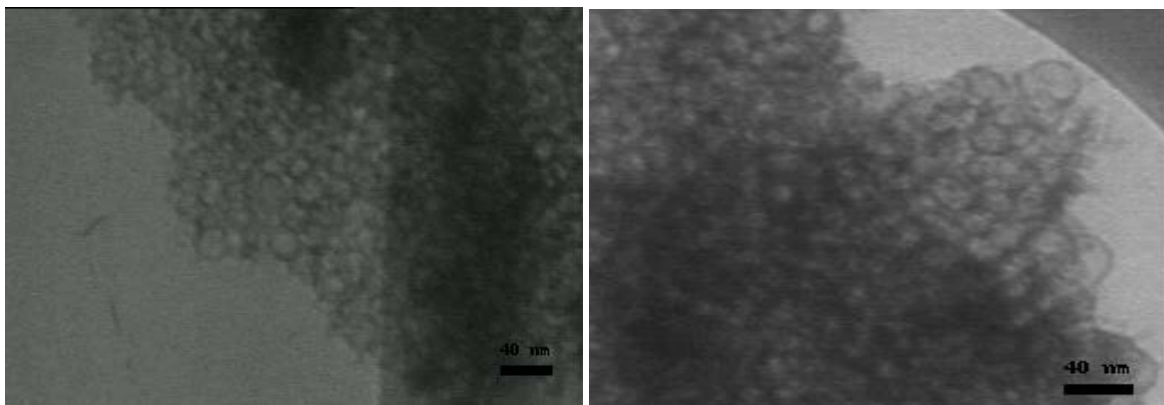

**Fig. S2.** TEM images of synthesized MCF used as support for immobilization of ADH enzyme. Scale bars are 40 nm.
